# Supplementary material
Source: PubMed Central journal article supplement (PMC5568558)
Supplement: NIHMS893143-supplement-Supplementary_Material.pdf [file NIHMS893143-supplement-Supplementary_Material.pdf]

Figure S1

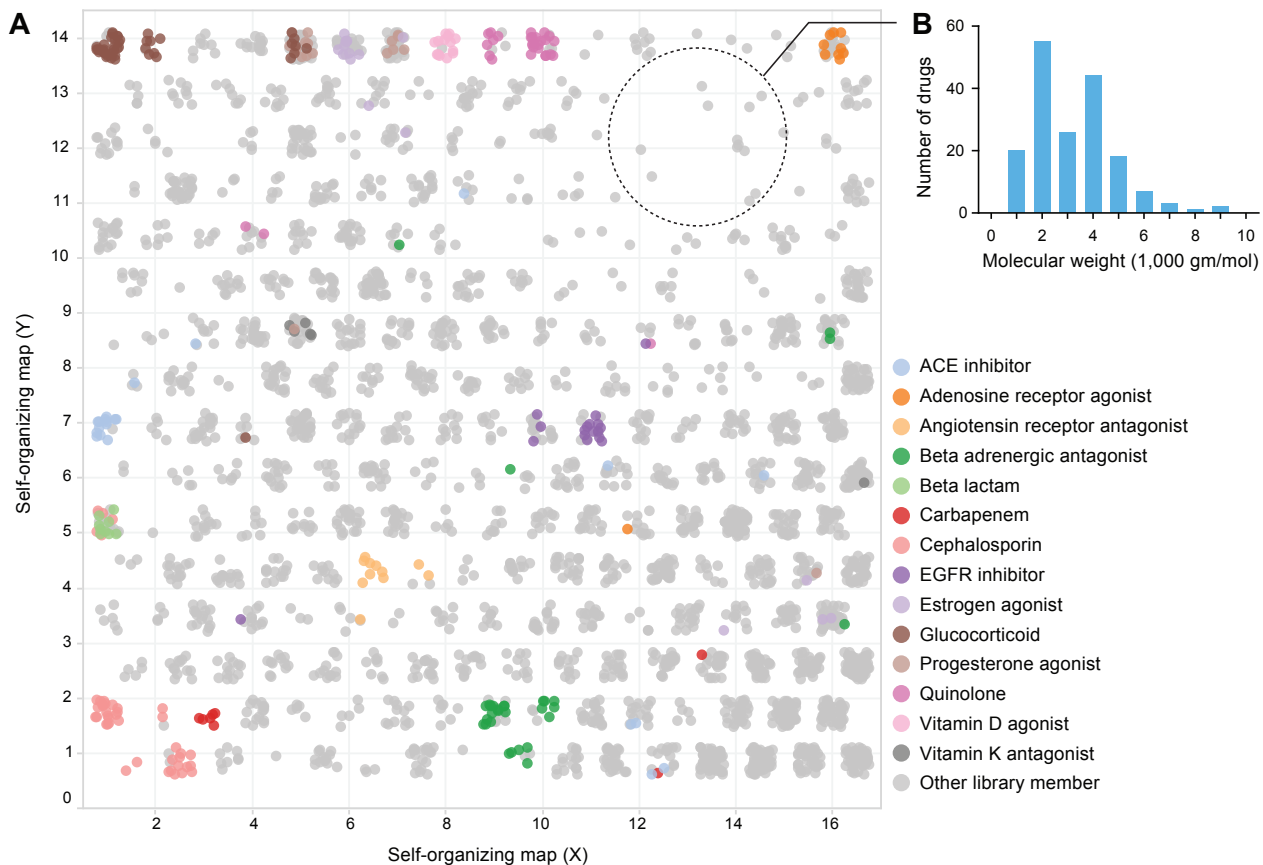

**Supplementary Figure 1:** Repurposing Library coverage of chemical structure diversity.

A) All identified clinical drugs are grouped into clusters using a self-organizing map of chemical fingerprints. Library members with known related features are indicated by color. B) Areas of reduced library coverage tend to include high molecular weight drugs. The molecular weight distribution for missing compounds within the designated map region is shown.

Figure S2

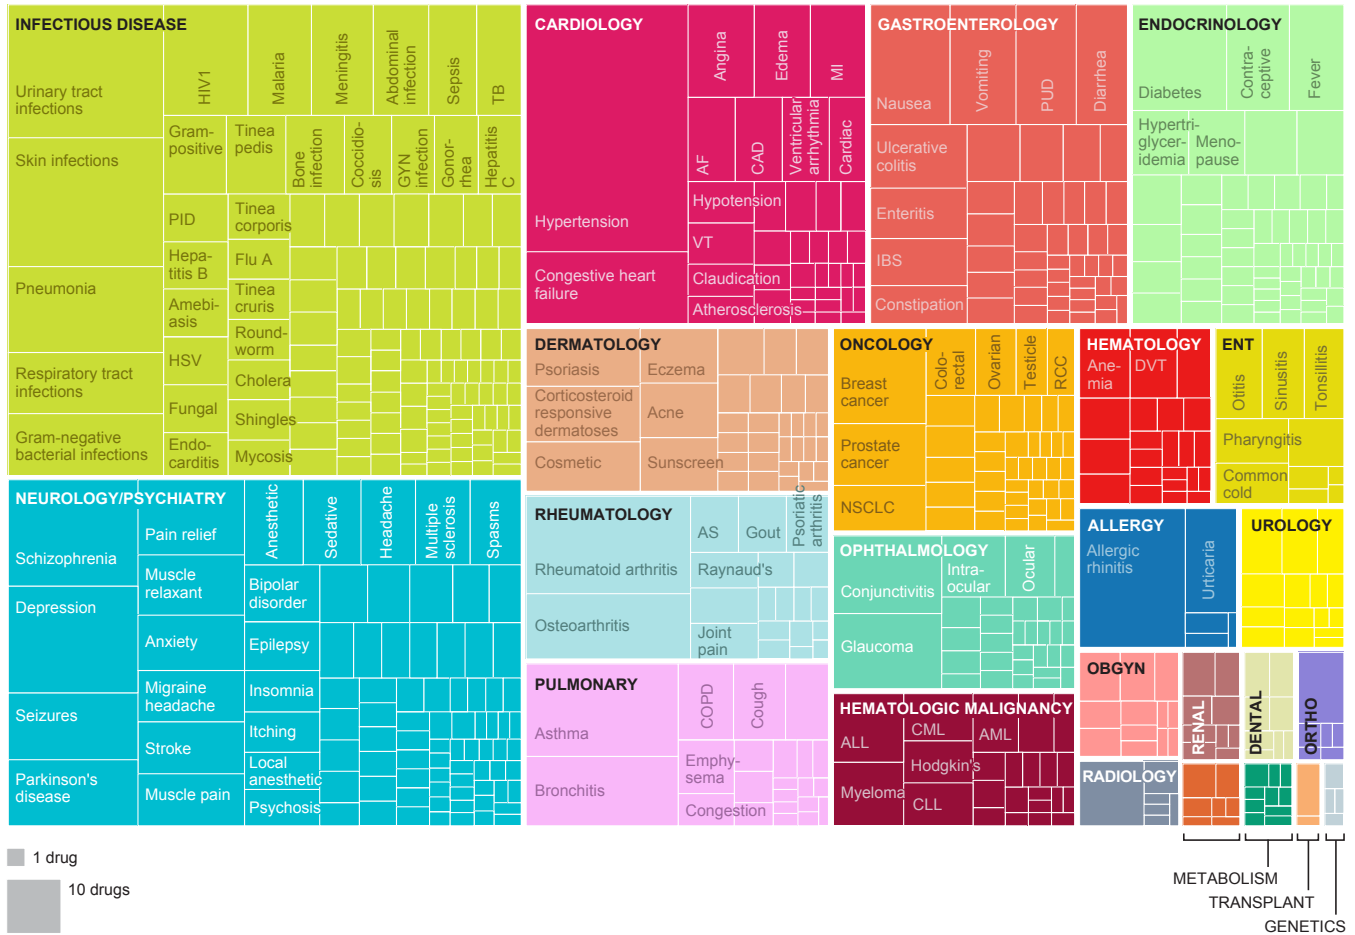

**Supplementary Figure 2: Curated indications for launched drugs.**

A total of 3,519 drug indication-pairs covering 1,918 drugs were obtained from official prescribing labels or other sources. Indications were mapped to a manually-curated vocabulary of 644 unique terms. The area shown for each indication is proportional to the number of corresponding drugs. Drugs with multiple approved indications appear more than once. Indication terms are grouped into one of 24 primary disease areas.

Figure S3

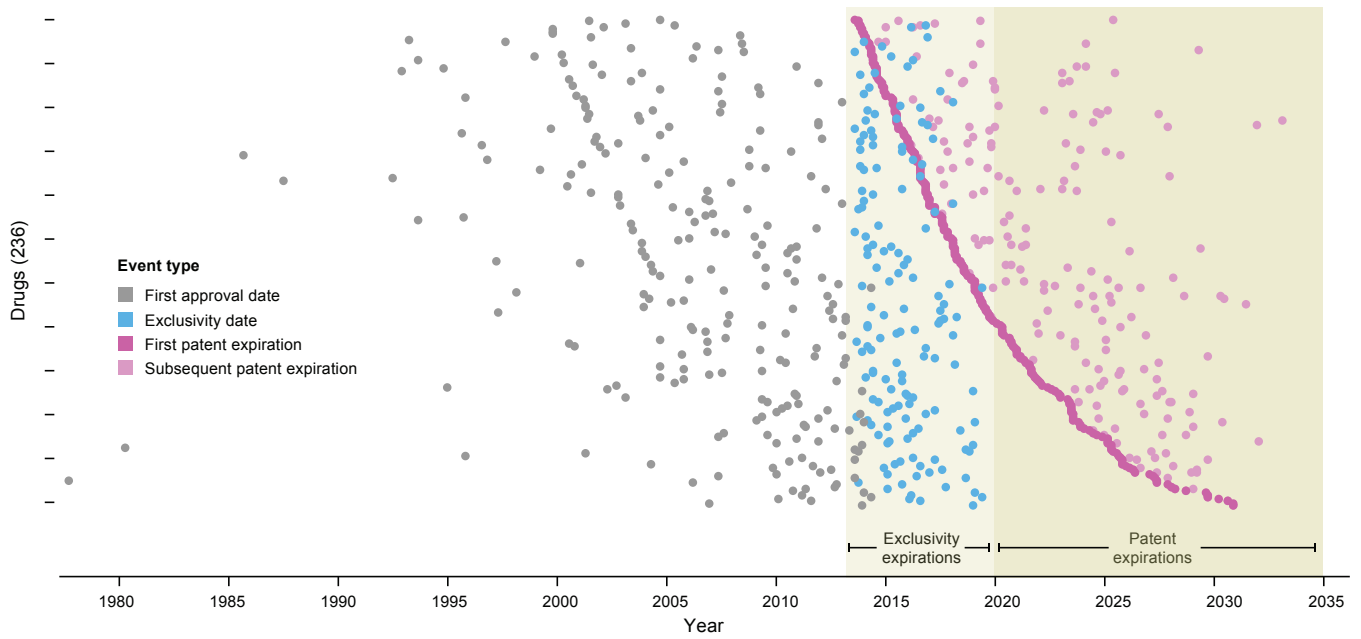

**Supplementary Figure 3:** Repurposing Hub coverage of drug patent and exclusivity information. Graphical overview of approval, exclusivity expiration, and patent expiration dates is shown. Drug ingredients were filtered to include only single-agent therapeutics and drugs covered by current substance patents. Rows are sorted by the first patent expiration.

Figure S4

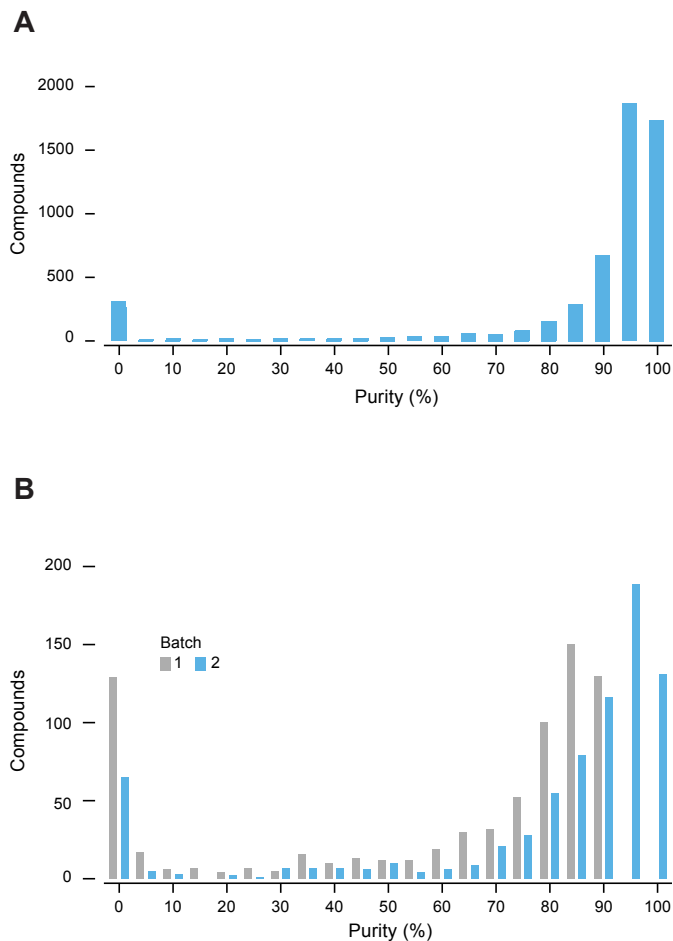

**Supplementary Figure 4: Library quality control.**

A) All compound samples were assessed by liquid chromatography-mass spectrometry to confirm compound identity and purity. In cases where multiple samples of the same compound were obtained, the best purity score for that compound is shown. Compounds were rejected if the purity was less than 85%. Each independent sample was tested once. B) Samples received in DMSO solution had lower purity. One chemical vendor re-supplied compounds with less than 90% purity upon initial testing of the DMSO samples (Batch 1). The second batch was shipped as dry powder (Batch 2).

Figure S5

**Supplementary Figure 5:** The Drug Repurposing Hub website.

A) The landing page of the Hub website displays updated library statistics. B) An interactive web application provides curated compound annotations, quality control results, and links to external databases. The Hub entry for sirolimus is shown as an example.

**A**

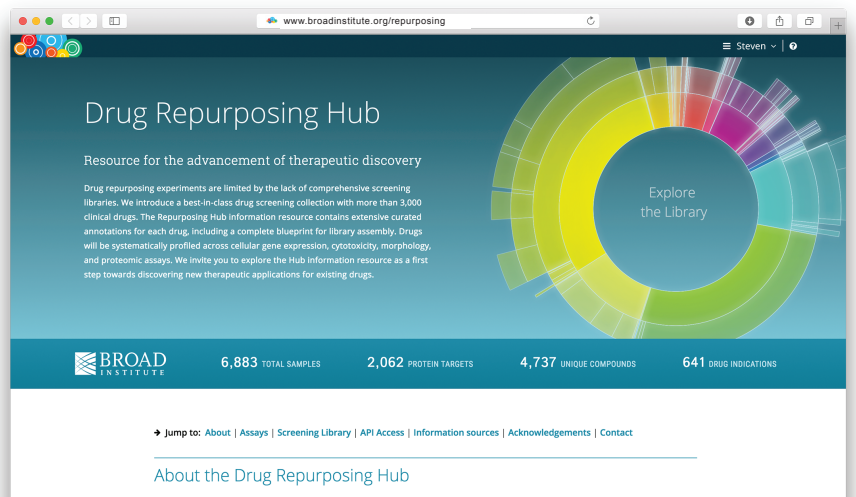

**B**

CP
< >

## Sirolimus

☆

---

Sample 1 | 2 | 3

---

**Broad ID:** BRD-K84937637-001-09-9  
**PubChem CID:** 5284616  
**Vendor:** Selleck - Rapamycin (Sirolimus) (S1039)

**Expected mass:** 913.555  
**Purity:** 95.47  
**QC result:** PASS

**Structure:**  
**InChIKey:** QFJCIRLUMZQUOT-HPLJQOBZSA-N  
**SMILES:** CO[C@@H]1C[C@@H](C[C@@H](C)[C@@H]2CC(=O)[C@@H](C)\C=C(C)\C@@H(O)[C@@H](OC)C(=O)[C@@H](C)C[C@@H](C)\C=C-C=C-C(C)\C@@H(C)[C@@H]3CC[C@@H](C)[C@@H](O)(O3)C(=O)N3CCC[C@@H]3C(=O)O)CC[C@H]1O

---

**Clinical Information**  
**Clinical Status:** Launched  
**FDA Orange Book:** sirolimus  
**Drugs@FDA:** rapamune, sirolimus

**Indications:**  
[Organ rejection \(transplant\)](#)  
[Lymphangioleiomyomatosis \(pulmonary\)](#)

---

**Mechanisms of Action**  
mTOR inhibitor

---

|        | 1 | 2 | 3 | 4 | Sources                    |
|--------|---|---|---|---|----------------------------|
| MTOR   | ⊙ | ⊙ | ⊙ | ⊙ | 1 <a href="#">ChEMBL</a>   |
| FKBP1A | ⊙ | ⊙ | ⊙ | ⊙ | 2 <a href="#">DrugBank</a> |
| FGF2   | ⊙ | ⊙ | ⊙ | ⊙ | 3 <a href="#">IUPHAR</a>   |
|        |   |   |   |   | 4 <a href="#">TTD</a>      |

---

Assay Data: [L1000](#) | [PRISM](#) | [Cell Painting](#) | [P100/GCP](#)

[Leave us a comment](#)

Figure S6

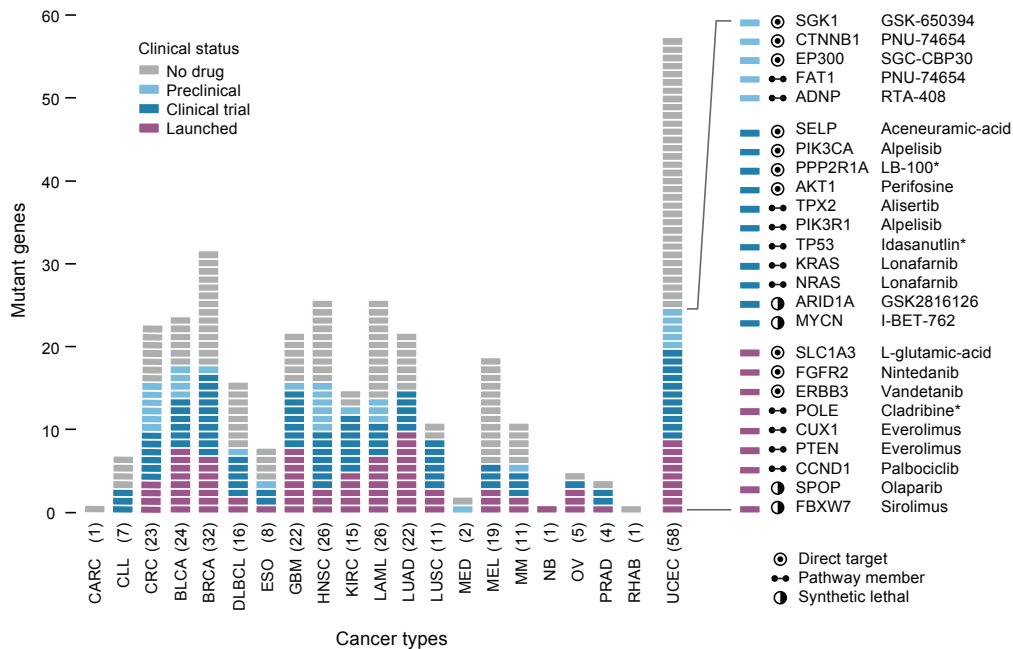

**Supplementary Figure 6:** Repurposing Hub drug coverage of significantly mutated genes in cancer. Tumor types from the Cancer Genome Atlas are listed in columns. For each statistically significantly mutated gene, the highest development status of a corresponding drug is indicated by a color code. Specific drug target information is shown for uterine corpus endometrial carcinoma (UCEC) as an example. Mechanisms of drug activity include direct targeting of the corresponding protein product, targeting of a downstream pathway member, or recapitulating a known synthetic lethal interaction. In some cases, marked by \*, gene mutation leads to loss of protein function that is unlikely to be reversed by the indicated small molecule inhibitor.

Corsello, et al.

Supplementary Table 1: Notable drug repurposing discoveries.

| <b>Clinical use</b>                                                    |                                                                                                                                                                                                                                                                  |
|------------------------------------------------------------------------|------------------------------------------------------------------------------------------------------------------------------------------------------------------------------------------------------------------------------------------------------------------|
| Aspirin to treat coronary artery disease                               | Flossmann, E., Rothwell, P. M. British Doctors Aspirin Trial and the UK-TIA Aspirin Trial. Effect of aspirin on long-term risk of colorectal cancer: consistent evidence from randomised and observational studies. <i>Lancet</i> <b>369</b> , 1603–1613 (2007). |
| Erythromycin to treat impaired gastric motility                        | Sturm, A., Holtmann, G., Goebell, H. & Gerken, G. Prokinetics in patients with gastroparesis: a systematic analysis. <i>Digestion</i> <b>60</b> , 422–427 (1999).                                                                                                |
| Sildenafil to treat erectile dysfunction                               | Goldstein, I. <i>et al.</i> Oral sildenafil in the treatment of erectile dysfunction. Sildenafil Study Group. <i>N. Engl. J. Med.</i> <b>338</b> , 1397–1404 (1998).                                                                                             |
| Thalidomide to treat multiple myeloma                                  | Palumbo, A. <i>et al.</i> Thalidomide for treatment of multiple myeloma: 10 years later. <i>Blood</i> <b>111</b> , 3968–3977 (2008).                                                                                                                             |
| <b>Gene expression discovery</b>                                       |                                                                                                                                                                                                                                                                  |
| Imipramine to treat small cell lung cancer                             | Jahchan, N. S. <i>et al.</i> A drug repositioning approach identifies tricyclic antidepressants as inhibitors of small cell lung cancer and other neuroendocrine tumors. <i>Cancer Discovery</i> <b>3</b> , 1364–1377 (2013).                                    |
| Sirolimus to treat glucocorticoid-resistant acute lymphocytic leukemia | Wei, G. <i>et al.</i> Gene expression-based chemical genomics identifies rapamycin as a modulator of MCL1 and glucocorticoid resistance. <i>Cancer Cell</i> <b>10</b> , 331–342 (2006).                                                                          |
| Topiramate to treat inflammatory bowel disease                         | Dudley, J. T. <i>et al.</i> Computational repositioning of the anticonvulsant topiramate for inflammatory bowel disease. <i>Sci. Transl. Med.</i> <b>3</b> , 96ra76 (2011).                                                                                      |
| <b>High-content imaging discovery</b>                                  |                                                                                                                                                                                                                                                                  |
| Lovastatin to inhibit leukemia stem cells                              | Hartwell, K. A. <i>et al.</i> Niche-based screening identifies small-molecule inhibitors of leukemia stem cells. <i>Nat. Chem. Biol.</i> <b>9</b> , 840–848 (2013).                                                                                              |

Supplementary Table 2: Additional resources relevant for drug repurposing experiments.

| <b>Cell line screening</b>                                                                   |                                                                                                                                                                                                             |
|----------------------------------------------------------------------------------------------|-------------------------------------------------------------------------------------------------------------------------------------------------------------------------------------------------------------|
| Analyzing activity data to determine molecular predictors of drug response                   | Basu, A. <i>et al.</i> An Interactive Resource to Identify Cancer Genetic and Lineage Dependencies Targeted by Small Molecules. <i>Cell</i> <b>154</b> , 1151–1161 (2013).                                  |
| Molecular features of cell lines (e.g., gene expression, mutation, or copy number variation) | Barretina, J. <i>et al.</i> The Cancer Cell Line Encyclopedia enables predictive modelling of anticancer drug sensitivity. <i>Nature</i> <b>483</b> , 603–607 (2012).                                       |
| Multiplex cytological imaging assay                                                          | Gustafsdottir, S. M. <i>et al.</i> Multiplex cytological profiling assay to measure diverse cellular states. <i>PLoS ONE</i> <b>8</b> , e80999 (2013).                                                      |
| Multiplex cytotoxicity profiling assay                                                       | Yu, C. <i>et al.</i> High-throughput identification of genotype-specific cancer vulnerabilities in mixtures of barcoded tumor cell lines. <i>Nat. Biotechnol.</i> <b>34</b> , 419–423 (2016).               |
| Systematic gene expression profiling                                                         | Lamb, J. <i>et al.</i> The Connectivity Map: using gene-expression signatures to connect small molecules, genes, and disease. <i>Science</i> <b>313</b> , 1929–1935 (2006).                                 |
| <b>Intellectual property</b>                                                                 |                                                                                                                                                                                                             |
| Relevance of drug patent and exclusivity status for repurposing                              | Smith, R. B. Repositioned drugs: integrating intellectual property and regulatory strategies. <i>Drug Discovery Today: Therapeutic Strategies</i> <b>8</b> , 131–137 (2011).                                |
| <b>Metadata capture</b>                                                                      |                                                                                                                                                                                                             |
| Published approach to capture experimental protocols using controlled vocabulary terms       | Howe, E. A. <i>et al.</i> BioAssay Research Database (BARD): chemical biology and probe-development enabled by structured metadata and result types. <i>Nucleic Acids Res.</i> <b>43</b> , D1163–70 (2015). |

## Supplementary Table 3

| Source                                  | Approval status | Structures | URL                                                                                                                                                                                                                                                                                                   |
|-----------------------------------------|-----------------|------------|-------------------------------------------------------------------------------------------------------------------------------------------------------------------------------------------------------------------------------------------------------------------------------------------------------|
| <b>Proprietary databases</b>            |                 |            |                                                                                                                                                                                                                                                                                                       |
| CAS SciFinder®                          | N               | Y          | <a href="http://www.cas.org/products/scifinder/">http://www.cas.org/products/scifinder/</a>                                                                                                                                                                                                           |
| Citeline Pharmaprojects®                | Y               | Y          | <a href="https://citeline.com/products/pharmaprojects/">https://citeline.com/products/pharmaprojects/</a>                                                                                                                                                                                             |
| Thomson Reuters Cortellis™              | Y               | Y          | <a href="http://thomsonreuters.com/en/products-services/pharma-life-sciences/pharma-competitive-intelligence/cortellis-competitive-intelligence.html">http://thomsonreuters.com/en/products-services/pharma-life-sciences/pharma-competitive-intelligence/cortellis-competitive-intelligence.html</a> |
| Thomson Reuters Integrity <sup>SM</sup> | Y               | Y          | <a href="http://thomsonreuters.com/en/products-services/pharma-life-sciences/pharmaceutical-research/integrity.html">http://thomsonreuters.com/en/products-services/pharma-life-sciences/pharmaceutical-research/integrity.html</a>                                                                   |
| <b>Public databases</b>                 |                 |            |                                                                                                                                                                                                                                                                                                       |
| ChEMBL                                  | Y               | Y          | <a href="https://www.ebi.ac.uk/chembl/">https://www.ebi.ac.uk/chembl/</a>                                                                                                                                                                                                                             |
| ClinicalTrials.gov                      | Y               | N          | <a href="https://clinicaltrials.gov/">https://clinicaltrials.gov/</a>                                                                                                                                                                                                                                 |
| DrugBank (4.3)                          | Y               | Y          | <a href="http://www.drugbank.ca/">http://www.drugbank.ca/</a>                                                                                                                                                                                                                                         |
| EU Clinical Trials Register             | Y               | N          | <a href="https://www.clinicaltrialsregister.eu/">https://www.clinicaltrialsregister.eu/</a>                                                                                                                                                                                                           |
| IUPHAR Guide to Pharmacology            | Y               | Y          | <a href="http://www.guidetopharmacology.org/">http://www.guidetopharmacology.org/</a>                                                                                                                                                                                                                 |
| NCATS NPC                               | Y               | Y          | <a href="http://tripod.nih.gov/npc/">http://tripod.nih.gov/npc/</a>                                                                                                                                                                                                                                   |
| <b>Regulatory agencies</b>              |                 |            |                                                                                                                                                                                                                                                                                                       |
| Canada DPD                              | Y               | N          | <a href="http://www.hc-sc.gc.ca/dhp-mps/prodpharma/databasdon/dpd_bdpp_data_extract-eng.php">http://www.hc-sc.gc.ca/dhp-mps/prodpharma/databasdon/dpd_bdpp_data_extract-eng.php</a>                                                                                                                   |
| Drugs@FDA                               | Y               | N          | <a href="https://www.accessdata.fda.gov/scripts/cder/drugsatfda/">https://www.accessdata.fda.gov/scripts/cder/drugsatfda/</a>                                                                                                                                                                         |
| EMA Belgium                             | Y               | N          | <a href="http://www.fagg-afmps.be/nl/items/gegevensbank_vergunde_geneesmiddelen/">http://www.fagg-afmps.be/nl/items/gegevensbank_vergunde_geneesmiddelen/</a>                                                                                                                                         |
| FDA Orange Book                         | Y               | N          | <a href="http://www.accessdata.fda.gov/scripts/cder/ob/">http://www.accessdata.fda.gov/scripts/cder/ob/</a>                                                                                                                                                                                           |
| FDA OTC                                 | Y               | N          | <a href="http://www.fda.gov/AboutFDA/CentersOffices/OfficeofMedicalProductsandTobacco/CDER/ucm106368.htm">http://www.fda.gov/AboutFDA/CentersOffices/OfficeofMedicalProductsandTobacco/CDER/ucm106368.htm</a>                                                                                         |
| Japan PMDA                              | Y               | N          | <a href="https://www.pmda.go.jp/english/review-services/reviews/approved-information/drugs/0002.html">https://www.pmda.go.jp/english/review-services/reviews/approved-information/drugs/0002.html</a>                                                                                                 |
| NIH DailyMed                            | Y               | N          | <a href="https://dailymed.nlm.nih.gov/dailymed/index.cfm">https://dailymed.nlm.nih.gov/dailymed/index.cfm</a>                                                                                                                                                                                         |

Supplementary Table 3: Databases searched for clinical drug chemical structures and annotations.



Corseello, et al.

Supplementary Table 4: Repurposing Hub drug coverage of significantly mutated genes in cancer.

| TCGA type | Mutant gene | Drug                  | Mechanism           | Drug target | Drug status     | Relationship source                                                                                             |
|-----------|-------------|-----------------------|---------------------|-------------|-----------------|-----------------------------------------------------------------------------------------------------------------|
| BLCA      | CREBBP      | SGC-CBP30             | direct target       | CREBBP      | Preclinical     | IUPHAR                                                                                                          |
| BLCA      | ERBB3       | vandetanib            | direct target       | ERBB3       | Launched        | ChEMBL                                                                                                          |
| BLCA      | FGFR3       | masitinib             | direct target       | FGFR3       | Launched        | <a href="http://meetinglibrary.asco.org/content/30794-65">http://meetinglibrary.asco.org/content/30794-65</a>   |
| BLCA      | KDM6A       | GSK-J4                | direct target       | KDM6A       | Preclinical     | <a href="http://www.chemicalprobes.org/GSK-J4/overview">http://www.chemicalprobes.org/GSK-J4/overview</a>       |
| BLCA      | NFE2L2      | RTA-408               | direct target       | NFE2L2      | Phase 2         | <a href="https://en.wikipedia.org/wiki/NFE2L2">https://en.wikipedia.org/wiki/NFE2L2</a>                         |
| BLCA      | PIK3CA      | alpelisib             | direct target       | PIK3CA      | Phase 3         | IUPHAR                                                                                                          |
| BLCA      | RXRA        | acitretin             | direct target       | RXRA        | Launched        | DrugBank                                                                                                        |
| BLCA      | CDKN1A      | GGTI-298              | pathway member      | CDKN1A      | Preclinical     | PMID9341167                                                                                                     |
| BLCA      | FOXQ1       | benzyl-isothiocyanate | pathway member      |             | Preclinical     | PMID23276794                                                                                                    |
| BLCA      | HRAS        | lonafarnib            | pathway member      | FNTA        | Phase 3         | PMID25878363                                                                                                    |
| BLCA      | TP53        | idasanutlin           | pathway member      | MDM2        | Phase 3         | PMID24188661                                                                                                    |
| BLCA      | TSC1        | sirolimus             | pathway member      | MTOR        | Launched        | PMID20048174                                                                                                    |
| BLCA      | ARID1A      | GSK2816126            | synthetic lethality | EZH2        | Phase 1         | PMID25686104                                                                                                    |
| BLCA      | ERCC2       | cisplatin             | synthetic lethality |             | Launched        | PMID25096233                                                                                                    |
| BLCA      | FBXW7       | sirolimus             | synthetic lethality | MTOR        | Launched        | PMID18787170                                                                                                    |
| BLCA      | MLL2        | EPZ-5676              | synthetic lethality | DOT1L       | Phase 1         | PMID23649466                                                                                                    |
| BLCA      | RB1         | etoposide             | synthetic lethality | TOP2A       | Launched        | PMID9032231                                                                                                     |
| BLCA      | STAG2       | olaparib              | synthetic lethality | PARP1       | Launched        | PMID24356817                                                                                                    |
| BRCA      | AKT1        | perifosine            | direct target       | AKT1        | Phase 3         | TTD                                                                                                             |
| BRCA      | ERBB2       | afatinib              | direct target       | ERBB2       | Launched        | DrugBank; IUPHAR; TTD                                                                                           |
| BRCA      | MAP2K4      | genistein             | direct target       | MAP2K4      | Phase 2/Phase 3 | PMID25019290                                                                                                    |
| BRCA      | MAP3K1      | PD-184352             | direct target       | MAP3K1      | Phase 2         | TTD                                                                                                             |
| BRCA      | MLL         | MM-102                | direct target       | MLL         | Preclinical     | PMID23210835                                                                                                    |
| BRCA      | PIK3CA      | alpelisib             | direct target       | PIK3CA      | Phase 3         | IUPHAR                                                                                                          |
| BRCA      | CASP8       | PAC-1                 | pathway member      | CASP3       | Phase 1         | PMID16936720                                                                                                    |
| BRCA      | CDH1        | dinaciclib            | pathway member      | CDK5        | Phase 3         | PMID26658992                                                                                                    |
| BRCA      | CUL4B       | thalidomide           | pathway member      | CRBN        | Launched        | PMID26460955                                                                                                    |
| BRCA      | GATA3       | dexamethasone         | pathway member      | NR3C1       | Launched        | PMID19124555                                                                                                    |
| BRCA      | KRAS        | lonafarnib            | pathway member      | FNTA        | Phase 3         | PMID25878363                                                                                                    |
| BRCA      | PIK3R1      | alpelisib             | pathway member      | PIK3CA      | Phase 3         | PMID18794884                                                                                                    |
| BRCA      | PTEN        | everolimus            | pathway member      | MTOR        | Launched        | PMID23582881                                                                                                    |
| BRCA      | TP53        | idasanutlin           | pathway member      | MDM2        | Phase 3         | PMID24188661                                                                                                    |
| BRCA      | ARID1A      | GSK2816126            | synthetic lethality | EZH2        | Phase 1         | PMID25686104                                                                                                    |
| BRCA      | RB1         | etoposide             | synthetic lethality | TOP2A       | Launched        | PMID9032231                                                                                                     |
| BRCA      | RUNX1       | olaparib              | synthetic lethality | PARP1       | Launched        | PMID26594843                                                                                                    |
| BRCA      | STAG2       | olaparib              | synthetic lethality | PARP1       | Launched        | PMID24356817                                                                                                    |
| CLL       | RPS2        | emetine               | direct target       | RPS2        | Phase 2         | <a href="http://en.wikipedia.org/wiki/Emetine">http://en.wikipedia.org/wiki/Emetine</a>                         |
| CLL       | XPO1        | selinexor             | direct target       | XPO1        | Phase 2/Phase 3 | <a href="http://www.selleckchem.com/products/kpt-330.html">http://www.selleckchem.com/products/kpt-330.html</a> |
| CLL       | TP53        | idasanutlin           | pathway member      | MDM2        | Phase 3         | PMID24188661                                                                                                    |
| CRC       | ACVR1B      | SB-431542             | direct target       | ACVR1B      | Preclinical     | PMID12065756                                                                                                    |
| CRC       | B2M         | 3-indolebutyric-acid  | direct target       | B2M         | Preclinical     | DrugBank                                                                                                        |
| CRC       | BRAF        | dabrafenib            | direct target       | BRAF        | Launched        | DrugBank; IUPHAR; TTD                                                                                           |
| CRC       | ERBB3       | vandetanib            | direct target       | ERBB3       | Launched        | ChEMBL                                                                                                          |

| TCGA type | Mutant gene | Drug                 | Mechanism           | Drug target | Drug status | Relationship source                                                                                                 |
|-----------|-------------|----------------------|---------------------|-------------|-------------|---------------------------------------------------------------------------------------------------------------------|
| CRC       | GOT1        | L-Aspartic-Acid      | direct target       | GOT1        | Launched    | DrugBank                                                                                                            |
| CRC       | PIK3CA      | alpelisib            | direct target       | PIK3CA      | Phase 3     | IUPHAR                                                                                                              |
| CRC       | SMAD2       | dexfosfoserine       | direct target       | SMAD2       | Preclinical | DrugBank                                                                                                            |
| CRC       | APC         | XAV-939              | pathway member      | TNKS1       | Preclinical | PMID19759537                                                                                                        |
| CRC       | AXIN2       | XAV-939              | pathway member      | TNKS1       | Preclinical | PMID19759537                                                                                                        |
| CRC       | CASP8       | PAC-1                | pathway member      | CASP3       | Phase 1     | PMID16936720                                                                                                        |
| CRC       | CDC27       | TAME                 | pathway member      | APC         | Preclinical | PMID20951947                                                                                                        |
| CRC       | KRAS        | lonafarnib           | pathway member      | FNTA        | Phase 3     | PMID25878363                                                                                                        |
| CRC       | NRAS        | lonafarnib           | pathway member      | FNTA        | Phase 3     | PMID25878363                                                                                                        |
| CRC       | TP53        | idasanutlin          | pathway member      | MDM2        | Phase 3     | PMID24188661                                                                                                        |
| CRC       | ARID1A      | GSK2816126           | synthetic lethality | EZH2        | Phase 1     | PMID25686104                                                                                                        |
| CRC       | FBXW7       | sirolimus            | synthetic lethality | MTOR        | Launched    | PMID18787170                                                                                                        |
| DLBCL     | BRAF        | dabrafenib           | direct target       | BRAF        | Launched    | DrugBank; IUPHAR; TTD                                                                                               |
| DLBCL     | CREBBP      | SGC-CBP30            | direct target       | CREBBP      | Preclinical | IUPHAR                                                                                                              |
| DLBCL     | EZH2        | tazemetostat         | direct target       | EZH2        | Phase 2     | IUPHAR                                                                                                              |
| DLBCL     | TNF         | VGX-1027             | direct target       | TNF         | Phase 1     | <a href="http://www.abcam.com/vgx-1027-git-27-ab145857.html">http://www.abcam.com/vgx-1027-git-27-ab145857.html</a> |
| DLBCL     | CARD11      | mepazine             | pathway member      | MALT1       | Phase 2     | PMID23238017                                                                                                        |
| DLBCL     | CD79B       | ibrutinib            | pathway member      | BTK         | Launched    | PMID26193343                                                                                                        |
| DLBCL     | TP53        | idasanutlin          | pathway member      | MDM2        | Phase 3     | PMID24188661                                                                                                        |
| DLBCL     | MLL2        | EPZ-5676             | synthetic lethality | DOT1L       | Phase 1     | PMID23649466                                                                                                        |
| ESO       | PIK3CA      | alpelisib            | direct target       | PIK3CA      | Phase 3     | IUPHAR                                                                                                              |
| ESO       | FLG         | JTC-801              | pathway member      | OPRL1       | Phase 2     | PMID24055295                                                                                                        |
| ESO       | IL7R        | ruxolitinib          | pathway member      | JAK2        | Launched    | PMID26208852                                                                                                        |
| ESO       | TP53        | idasanutlin          | pathway member      | MDM2        | Phase 3     | PMID24188661                                                                                                        |
| GBM       | AZGP1       | aceneuramic-acid     | direct target       | AZGP1       | Phase 3     | Drugbank                                                                                                            |
| GBM       | BRAF        | dabrafenib           | direct target       | BRAF        | Launched    | DrugBank; IUPHAR; TTD                                                                                               |
| GBM       | DDX5        | resveratrol          | direct target       | DDX5        | Launched    | PMID27148684                                                                                                        |
| GBM       | EGFR        | afatinib             | direct target       | EGFR        | Launched    | DrugBank; IUPHAR; TTD                                                                                               |
| GBM       | IDH1        | AGI-5198             | direct target       | IDH1        | Preclinical | <a href="http://www.apexbt.com/agi-5198.html">http://www.apexbt.com/agi-5198.html</a>                               |
| GBM       | MAP3K1      | PD-184352            | direct target       | MAP3K1      | Phase 2     | TTD                                                                                                                 |
| GBM       | PIK3CA      | alpelisib            | direct target       | PIK3CA      | Phase 3     | IUPHAR                                                                                                              |
| GBM       | CD1D        | vorinostat           | pathway member      | HDAC1       | Launched    | PMID22419072                                                                                                        |
| GBM       | PIK3R1      | alpelisib            | pathway member      | PIK3CA      | Phase 3     | PMID18794884                                                                                                        |
| GBM       | PTEN        | everolimus           | pathway member      | MTOR        | Launched    | PMID23582881                                                                                                        |
| GBM       | TP53        | idasanutlin          | pathway member      | MDM2        | Phase 3     | PMID24188661                                                                                                        |
| GBM       | CHD8        | I-BET-762            | synthetic lethality | BRD4        | Phase 2     | PMID24584072                                                                                                        |
| GBM       | NF1         | sirolimus            | synthetic lethality | MTOR        | Launched    | PMID15937108                                                                                                        |
| GBM       | RB1         | etoposide            | synthetic lethality | TOP2A       | Launched    | PMID9032231                                                                                                         |
| GBM       | SETD2       | AZD6482              | synthetic lethality | PIK3CB      | Phase 1     | PMID26537074                                                                                                        |
| GBM       | STAG2       | olaparib             | synthetic lethality | PARP1       | Launched    | PMID24356817                                                                                                        |
| HNSC      | B2M         | 3-indolebutyric-acid | direct target       | B2M         | Preclinical | DrugBank                                                                                                            |
| HNSC      | EP300       | SGC-CBP30            | direct target       | EP300       | Preclinical | IUPHAR                                                                                                              |
| HNSC      | EPHA2       | dasatinib            | direct target       | EPHA2       | Launched    | ChEMBL; DrugBank                                                                                                    |
| HNSC      | MAP4K3      | bosutinib            | direct target       | MAP4K3      | Launched    | PMID22037378                                                                                                        |
| HNSC      | NFE2L2      | RTA-408              | direct target       | NFE2L2      | Phase 2     | <a href="https://en.wikipedia.org/wiki/NFE2L2">https://en.wikipedia.org/wiki/NFE2L2</a>                             |
| HNSC      | NOTCH1      | FLI-06               | direct target       | NOTCH1      | Preclinical | PMID24077179                                                                                                        |

| TCGA type | Mutant gene | Drug              | Mechanism           | Drug target | Drug status | Relationship source                                                                                 |
|-----------|-------------|-------------------|---------------------|-------------|-------------|-----------------------------------------------------------------------------------------------------|
| HNSC      | PIK3CA      | alpelisib         | direct target       | PIK3CA      | Phase 3     | IUPHAR                                                                                              |
| HNSC      | TGFBR2      | LY2109761         | direct target       | TGFBR2      | Preclinical | IUPHAR                                                                                              |
| HNSC      | AJUBA       | PNU-74654         | pathway member      | CTNNB1      | Preclinical | PMID17621269                                                                                        |
| HNSC      | CASP8       | PAC-1             | pathway member      | CASP3       | Phase 1     | PMID16936720                                                                                        |
| HNSC      | FAT1        | PNU-74654         | pathway member      | CTNNB1      | Preclinical | PMID23354438                                                                                        |
| HNSC      | HRAS        | lonafarnib        | pathway member      | FNTA        | Phase 3     | PMID25878363                                                                                        |
| HNSC      | PTEN        | everolimus        | pathway member      | MTOR        | Launched    | PMID23582881                                                                                        |
| HNSC      | RHOA        | Y-39983           | pathway member      | ROCK1       | Phase 2     | PMID25010901                                                                                        |
| HNSC      | TP53        | idasanutlin       | pathway member      | MDM2        | Phase 3     | PMID24188661                                                                                        |
| HNSC      | MLL2        | EPZ-5676          | synthetic lethality | DOT1L       | Phase 1     | PMID23649466                                                                                        |
| KIRC      | ATM         | VE-822            | direct target       | ATM         | Phase 2     | IUPHAR                                                                                              |
| KIRC      | GUSB        | L-Aspartic-Acid   | direct target       | GUSB        | Launched    | PMID11568288                                                                                        |
| KIRC      | KDM5C       | IOX2              | direct target       | KDM5C       | Preclinical | IUPHAR                                                                                              |
| KIRC      | MPO         | cefdinir          | direct target       | MPO         | Launched    | DrugBank                                                                                            |
| KIRC      | MTOR        | everolimus        | direct target       | MTOR        | Launched    | DrugBank; IUPHAR; TTD                                                                               |
| KIRC      | PTEN        | everolimus        | pathway member      | MTOR        | Launched    | PMID23582881                                                                                        |
| KIRC      | RHEB        | lonafarnib        | pathway member      | FNTA        | Phase 3     | PMID16006564                                                                                        |
| KIRC      | TP53        | idasanutlin       | pathway member      | MDM2        | Phase 3     | PMID24188661                                                                                        |
| KIRC      | ARID1A      | GSK2816126        | synthetic lethality | EZH2        | Phase 1     | PMID25686104                                                                                        |
| KIRC      | BAP1        | GSK2816126        | synthetic lethality | EZH2        | Phase 1     | PMID26437366                                                                                        |
| KIRC      | PBRM1       | GSK2816126        | synthetic lethality | EZH2        | Phase 1     | PMID26552009                                                                                        |
| KIRC      | SETD2       | AZD6482           | synthetic lethality | PIK3CB      | Phase 1     | PMID26537074                                                                                        |
| KIRC      | VHL         | homoharringtonine | synthetic lethality | RPL3        | Launched    | PMID26219258                                                                                        |
| LAML      | DNMT3A      | azacitidine       | direct target       | DNMT3A      | Launched    | ChEMBL                                                                                              |
| LAML      | EZH2        | tazemetostat      | direct target       | EZH2        | Phase 2     | IUPHAR                                                                                              |
| LAML      | FLT3        | sorafenib         | direct target       | FLT3        | Launched    | DrugBank; IUPHAR                                                                                    |
| LAML      | IDH1        | AGI-5198          | direct target       | IDH1        | Preclinical | <a href="http://www.apexbt.com/agi-5198.html">http://www.apexbt.com/agi-5198.html</a>               |
| LAML      | IDH2        | AGI-6780          | direct target       | IDH2        | Preclinical | <a href="http://www.apexbt.com/agi-6780.html">http://www.apexbt.com/agi-6780.html</a>               |
| LAML      | KIT         | dasatinib         | direct target       | KIT         | Launched    | ChEMBL; DrugBank                                                                                    |
| LAML      | PTPN11      | BVT-948           | direct target       | PTPN11      | Preclinical | <a href="http://www.abcam.com/bvt-948-ab141304.html">http://www.abcam.com/bvt-948-ab141304.html</a> |
| LAML      | KRAS        | lonafarnib        | pathway member      | FNTA        | Phase 3     | PMID25878363                                                                                        |
| LAML      | NRAS        | lonafarnib        | pathway member      | FNTA        | Phase 3     | PMID25878363                                                                                        |
| LAML      | TP53        | idasanutlin       | pathway member      | MDM2        | Phase 3     | PMID24188661                                                                                        |
| LAML      | NPM1        | tretinoin         | synthetic lethality | RARA        | Launched    | PMID26022051                                                                                        |
| LAML      | RAD21       | olaparib          | synthetic lethality | PARP1       | Launched    | PMID22412391                                                                                        |
| LAML      | RUNX1       | olaparib          | synthetic lethality | PARP1       | Launched    | PMID26594843                                                                                        |
| LAML      | STAG2       | olaparib          | synthetic lethality | PARP1       | Launched    | PMID24356817                                                                                        |
| LUAD      | ATM         | VE-822            | direct target       | ATM         | Phase 2     | IUPHAR                                                                                              |
| LUAD      | BRAF        | dabrafenib        | direct target       | BRAF        | Launched    | DrugBank; IUPHAR; TTD                                                                               |
| LUAD      | EGFR        | afatinib          | direct target       | EGFR        | Launched    | DrugBank; IUPHAR; TTD                                                                               |
| LUAD      | ERBB2       | afatinib          | direct target       | ERBB2       | Launched    | DrugBank; IUPHAR; TTD                                                                               |
| LUAD      | KEAP1       | dimethyl-fumarate | direct target       | KEAP1       | Launched    | ChEMBL; DrugBank                                                                                    |
| LUAD      | MAP2K1      | trametinib        | direct target       | MAP2K1      | Launched    | DrugBank; IUPHAR                                                                                    |
| LUAD      | MET         | alectinib         | direct target       | MET         | Launched    | IUPHAR                                                                                              |
| LUAD      | PIK3CA      | alpelisib         | direct target       | PIK3CA      | Phase 3     | IUPHAR                                                                                              |
| LUAD      | STK11       | nintedanib        | direct target       | STK11       | Launched    | PMID22037378                                                                                        |

| TCGA type | Mutant gene | Drug              | Mechanism           | Drug target | Drug status | Relationship source                                                                                           |
|-----------|-------------|-------------------|---------------------|-------------|-------------|---------------------------------------------------------------------------------------------------------------|
| LUAD      | KRAS        | lonafarnib        | pathway member      | FNTA        | Phase 3     | <a href="#">PMID25878363</a>                                                                                  |
| LUAD      | RIT1        | trametinib        | pathway member      | MAP2K1      | Launched    | <a href="#">PMID24469055</a>                                                                                  |
| LUAD      | TP53        | idasanutlin       | pathway member      | MDM2        | Phase 3     | <a href="#">PMID24188661</a>                                                                                  |
| LUAD      | ARID1A      | GSK2816126        | synthetic lethality | EZH2        | Phase 1     | <a href="#">PMID25686104</a>                                                                                  |
| LUAD      | NF1         | sirolimus         | synthetic lethality | MTOR        | Launched    | <a href="#">PMID15937108</a>                                                                                  |
| LUAD      | RB1         | etoposide         | synthetic lethality | TOP2A       | Launched    | <a href="#">PMID9032231</a>                                                                                   |
| LUSC      | KEAP1       | dimethyl-fumarate | direct target       | KEAP1       | Launched    | <a href="#">ChEMBL</a> ; <a href="#">DrugBank</a>                                                             |
| LUSC      | NFE2L2      | RTA-408           | direct target       | NFE2L2      | Phase 2     | <a href="https://en.wikipedia.org/wiki/NFE2L2">https://en.wikipedia.org/wiki/NFE2L2</a>                       |
| LUSC      | PIK3CA      | alpelisib         | direct target       | PIK3CA      | Phase 3     | <a href="#">IUPHAR</a>                                                                                        |
| LUSC      | HRAS        | lonafarnib        | pathway member      | FNTA        | Phase 3     | <a href="#">PMID25878363</a>                                                                                  |
| LUSC      | TP53        | idasanutlin       | pathway member      | MDM2        | Phase 3     | <a href="#">PMID24188661</a>                                                                                  |
| LUSC      | ARID1A      | GSK2816126        | synthetic lethality | EZH2        | Phase 1     | <a href="#">PMID25686104</a>                                                                                  |
| LUSC      | FBXW7       | sirolimus         | synthetic lethality | MTOR        | Launched    | <a href="#">PMID18787170</a>                                                                                  |
| LUSC      | MLL2        | EPZ-5676          | synthetic lethality | DOT1L       | Phase 1     | <a href="#">PMID23649466</a>                                                                                  |
| LUSC      | RB1         | etoposide         | synthetic lethality | TOP2A       | Launched    | <a href="#">PMID9032231</a>                                                                                   |
| MED       | CTNNB1      | PNU-74654         | direct target       | CTNNB1      | Preclinical | <a href="http://www.tocris.com/disprod.php?ItemId=225597">http://www.tocris.com/disprod.php?ItemId=225597</a> |
| MEL       | BRAF        | dabrafenib        | direct target       | BRAF        | Launched    | <a href="#">DrugBank</a> ; <a href="#">IUPHAR</a> ; <a href="#">TTD</a>                                       |
| MEL       | CDK4        | palbociclib       | direct target       | CDK4        | Launched    | <a href="#">IUPHAR</a> ; <a href="#">TTD</a>                                                                  |
| MEL       | NRAS        | lonafarnib        | pathway member      | FNTA        | Phase 3     | <a href="#">PMID25878363</a>                                                                                  |
| MEL       | PTEN        | everolimus        | pathway member      | MTOR        | Launched    | <a href="#">PMID23582881</a>                                                                                  |
| MEL       | TP53        | idasanutlin       | pathway member      | MDM2        | Phase 3     | <a href="#">PMID24188661</a>                                                                                  |
| MEL       | PPP6C       | alisertib         | synthetic lethality | AURKA       | Phase 3     | <a href="#">PMID24336958</a>                                                                                  |
| MM        | BRAF        | dabrafenib        | direct target       | BRAF        | Launched    | <a href="#">DrugBank</a> ; <a href="#">IUPHAR</a> ; <a href="#">TTD</a>                                       |
| MM        | IDH1        | AGI-5198          | direct target       | IDH1        | Preclinical | <a href="http://www.apexbt.com/agi-5198.html">http://www.apexbt.com/agi-5198.html</a>                         |
| MM        | IRF4        | simvastatin       | pathway member      | HMGCR       | Launched    | <a href="#">PMID21856936</a>                                                                                  |
| MM        | KRAS        | lonafarnib        | pathway member      | FNTA        | Phase 3     | <a href="#">PMID25878363</a>                                                                                  |
| MM        | NRAS        | lonafarnib        | pathway member      | FNTA        | Phase 3     | <a href="#">PMID25878363</a>                                                                                  |
| MM        | TP53        | idasanutlin       | pathway member      | MDM2        | Phase 3     | <a href="#">PMID24188661</a>                                                                                  |
| NB        | ALK         | alectinib         | direct target       | ALK         | Launched    | <a href="#">IUPHAR</a>                                                                                        |
| OV        | CDK12       | alvocidib         | direct target       | CDK12       | Phase 2     | <a href="#">PMID24662513</a>                                                                                  |
| OV        | TP53        | idasanutlin       | pathway member      | MDM2        | Phase 3     | <a href="#">PMID24188661</a>                                                                                  |
| OV        | BRCA1       | olaparib          | synthetic lethality | PARP1       | Launched    | <a href="#">PMID25366685</a>                                                                                  |
| OV        | NF1         | sirolimus         | synthetic lethality | MTOR        | Launched    | <a href="#">PMID15937108</a>                                                                                  |
| OV        | RB1         | etoposide         | synthetic lethality | TOP2A       | Launched    | <a href="#">PMID9032231</a>                                                                                   |
| PRAD      | ATM         | VE-822            | direct target       | ATM         | Phase 2     | <a href="#">IUPHAR</a>                                                                                        |
| PRAD      | TP53        | idasanutlin       | pathway member      | MDM2        | Phase 3     | <a href="#">PMID24188661</a>                                                                                  |
| PRAD      | SPOP        | olaparib          | synthetic lethality | PARP1       | Launched    | <a href="#">PMID26374986</a>                                                                                  |
| UCEC      | AKT1        | perifosine        | direct target       | AKT1        | Phase 3     | <a href="#">TTD</a>                                                                                           |
| UCEC      | CTNNB1      | PNU-74654         | direct target       | CTNNB1      | Preclinical | <a href="http://www.tocris.com/disprod.php?ItemId=225597">http://www.tocris.com/disprod.php?ItemId=225597</a> |
| UCEC      | EP300       | SGC-CBP30         | direct target       | EP300       | Preclinical | <a href="#">IUPHAR</a>                                                                                        |
| UCEC      | ERBB3       | vandetanib        | direct target       | ERBB3       | Launched    | <a href="#">ChEMBL</a>                                                                                        |
| UCEC      | FGFR2       | nintedanib        | direct target       | FGFR2       | Launched    | <a href="#">IUPHAR</a>                                                                                        |
| UCEC      | PIK3CA      | alpelisib         | direct target       | PIK3CA      | Phase 3     | <a href="#">IUPHAR</a>                                                                                        |
| UCEC      | PPP2R1A     | LB-100            | direct target       | PPP2R1A     | Phase 1     | <a href="#">PMID23780887</a>                                                                                  |
| UCEC      | SELP        | aceneuramic-acid  | direct target       | SELP        | Phase 3     | <a href="#">DrugBank</a> ; <a href="#">TTD</a>                                                                |
| UCEC      | SGK1        | GSK-650394        | direct target       | SGK1        | Preclinical | <a href="#">IUPHAR</a>                                                                                        |

| TCGA type | Mutant gene | Drug            | Mechanism           | Drug target | Drug status | Relationship source          |
|-----------|-------------|-----------------|---------------------|-------------|-------------|------------------------------|
| UCEC      | SLC1A3      | L-glutamic-acid | direct target       | SLC1A3      | Launched    | <a href="#">DrugBank</a>     |
| UCEC      | ADNP        | RTA-408         | pathway member      | NFE2L2      | Preclinical | <a href="#">PMID19130308</a> |
| UCEC      | CCDC6       | P22077          | pathway member      | USP7        | Preclinical | <a href="#">PMID27372520</a> |
| UCEC      | CCND1       | palbociclib     | pathway member      | CDK4        | Launched    | <a href="#">PMID25524798</a> |
| UCEC      | CUX1        | everolimus      | pathway member      | MTOR        | Launched    | <a href="#">PMID24316979</a> |
| UCEC      | FAT1        | PNU-74654       | pathway member      | CTNNB1      | Preclinical | <a href="#">PMID23354438</a> |
| UCEC      | KRAS        | lonafarnib      | pathway member      | FNTA        | Phase 3     | <a href="#">PMID25878363</a> |
| UCEC      | NRAS        | lonafarnib      | pathway member      | FNTA        | Phase 3     | <a href="#">PMID25878363</a> |
| UCEC      | PIK3R1      | alpelisib       | pathway member      | PIK3CA      | Phase 3     | <a href="#">PMID18794884</a> |
| UCEC      | POLE        | cladribine      | pathway member      | ADA         | Launched    | <a href="#">PMID18794884</a> |
| UCEC      | PTEN        | everolimus      | pathway member      | MTOR        | Launched    | <a href="#">PMID23582881</a> |
| UCEC      | TP53        | idasanutlin     | pathway member      | MDM2        | Phase 3     | <a href="#">PMID24188661</a> |
| UCEC      | TPX2        | alisertib       | pathway member      | AURKA       | Phase 3     | <a href="#">PMID21879811</a> |
| UCEC      | ARID1A      | GSK2816126      | synthetic lethality | EZH2        | Phase 1     | <a href="#">PMID25686104</a> |
| UCEC      | FBXW7       | sirolimus       | synthetic lethality | MTOR        | Launched    | <a href="#">PMID18787170</a> |
| UCEC      | MYCN        | I-BET-762       | synthetic lethality | BRD4        | Phase 2     | <a href="#">PMID23430699</a> |
| UCEC      | SPOP        | olaparib        | synthetic lethality | PARP1       | Launched    | <a href="#">PMID26374986</a> |
